# Supplementary material
Source: publisher figshare collection journal article supplement (https://acs.figshare.com/ndownloader/files/4122928)
Supplement: Supplementary file 1 [file 4122928]

## Ethylene oxidation by a Pt(II) hydroxo complex. Insights into the Wacker Process

Nandita M. Weliange and Paul R. Sharp\*

125 Chemistry

University of Missouri-Columbia

Columbia, MO 65211

sharp@missouri.edu

### Supporting Information

#### Contents

|                                                                                                                                                                                                                                                                                                                                            |    |
|--------------------------------------------------------------------------------------------------------------------------------------------------------------------------------------------------------------------------------------------------------------------------------------------------------------------------------------------|----|
| Table S1. Variable temperature $^1\text{H}$ and $^{195}\text{Pt}$ NMR data for ethylene reaction of 4.....                                                                                                                                                                                                                                 | 3  |
| Figure S1. Ethylene reaction profile for $[\text{Pt}(\text{COD})(\text{OH})_2][\text{OTf}]_2$ (4) in $\text{CD}_2\text{Cl}_2$ at 27 °C with 10% $\text{H}_2\text{O}$ , $[\text{4}] = 9 \text{ mM}$ , $[\text{C}_2\text{H}_4] = 200 \text{ mM}$ . Slopes are from least squares fits to linear portions of the plots. ....                  | 4  |
| Figure S2. Ethylene reaction profile for $[\text{Pt}(\text{COD})(\text{OH})_2][\text{OTf}]_2$ (4) in $\text{CD}_2\text{Cl}_2$ at 27 °C with 10% $\text{Pt}(\text{COD})(\text{OTf})_2$ , $[\text{4}] = 9 \text{ mM}$ , $[\text{C}_2\text{H}_4] = 200 \text{ mM}$ . Slopes are from least squares fits to linear portions of the plots. .... | 5  |
| Figure S3. Ethylene reaction profile for $[\text{Pt}(\text{COD})(\text{OH})_2][\text{OTf}]_2$ (4) in $\text{CD}_3\text{NO}_2$ at 27 °C ( $[\text{4}] = 9 \text{ mM}$ , $[\text{C}_2\text{H}_4] \sim 200 \text{ mM}$ ). Slopes are from least squares fits to linear portions of the plots.....                                             | 6  |
| Figure S4. Ethylene reaction profile for a 10:1 mixture of 10 and 11 (prepared in situ from 4 (~9 mM) and vinyloxy-trimethylsilane) in $\text{CD}_2\text{Cl}_2$ at 27 °C with 10% HOTf and $[\text{C}_2\text{H}_4] = 200 \text{ mM}$ . Acetaldehyde from the preparation of 10 has been subtracted. ....                                   | 7  |
| Kinetic fitting and simulations of phases 1 and 2.....                                                                                                                                                                                                                                                                                     | 7  |
| A)    Acidic coordinated water model with fitting parameters .....                                                                                                                                                                                                                                                                         | 7  |
| Figure S5. Acidic water model fit of phases 1 and 2. ....                                                                                                                                                                                                                                                                                  | 8  |
| Table S2. Acidic water model equations. ....                                                                                                                                                                                                                                                                                               | 8  |
| Table S3. Acidic water model initial concentrations. ....                                                                                                                                                                                                                                                                                  | 8  |
| Table S4. Acidic water model fitted parameters. ....                                                                                                                                                                                                                                                                                       | 9  |
| Figure S6. Phases 1 and 2 acidic water model simulation using fitted parameters.....                                                                                                                                                                                                                                                       | 10 |
| Figure S7. Phases 1 and 2 acidic water model simulation with 4% $\text{H}^+$ .....                                                                                                                                                                                                                                                         | 11 |
| Figure S8. Phases 1 and 2 acidic water model simulation with 10% initial water.....                                                                                                                                                                                                                                                        | 12 |
| B) $\text{Pt}(\text{COD})(\text{OTf})_2$ (BT) impurity (1%) model with fitted parameters.....                                                                                                                                                                                                                                              | 12 |
| Table S5. Impurity model equations.....                                                                                                                                                                                                                                                                                                    | 12 |

|                                                                                                                                                                          |    |
|--------------------------------------------------------------------------------------------------------------------------------------------------------------------------|----|
| Table S6. Impurity model initial concentrations. ....                                                                                                                    | 13 |
| Figure S9. Impurity model fit of phases 1 and 2 (1% BT). ....                                                                                                            | 13 |
| Table S7. Impurity model fitted parameters. ....                                                                                                                         | 13 |
| Figure S10. Phases 1 and 2 impurity model simulation using fitted parameters (1% BT).<br>.....                                                                           | 14 |
| Figure S11. Phases 1 and 2 impurity model simulation with 4% H <sup>+</sup> (1% BT). Upper<br>green line is monomer A. Dimer AA (4) is consumed in less than 1 min. .... | 15 |
| Experimental .....                                                                                                                                                       | 15 |

**Table S1.** Variable temperature  $^1\text{H}$  and  $^{195}\text{Pt}$  NMR data for ethylene reaction of **4**.

| Entry and Description |                                                                          | Temp   | $^1\text{H}$ NMR ( $\delta$ ) <sup>a</sup> | $^{195}\text{Pt}$ NMR ( $\delta$ )                                                |
|-----------------------|--------------------------------------------------------------------------|--------|--------------------------------------------|-----------------------------------------------------------------------------------|
| 1                     | 1 h after $\text{C}_2\text{H}_4$ addition<br>(yield of <b>6+7</b> = 10%) | RT     | 1.52 (br)                                  | -2762 ( <b>4</b> ), -3081 ( <b>10</b> ), -3416 ( <b>10</b> )                      |
|                       |                                                                          | 0 °C   | 1.81 (br), 11.4 <sup>b</sup>               | -2775 ( <b>4</b> ), -3092 ( <b>10</b> ), -3424 ( <b>10</b> )                      |
|                       |                                                                          | -50 °C | 4.07 (br), <sup>c</sup> 11.4 <sup>b</sup>  | -2806 ( <b>4</b> ), -3110 ( <b>10</b> ), -3441 ( <b>10</b> )                      |
| 2                     | Maximum <b>10</b> (yield of <b>6+7</b> = 33%)                            | RT     | 2.11 (br), 11.4 <sup>b</sup>               | -3080 ( <b>10</b> ), -3415 ( <b>10</b> ), -3872 ( <b>7</b> )                      |
|                       |                                                                          | -20 °C | 3.62 (br), 11.4 <sup>b</sup>               | -3099 ( <b>10</b> ), -3431 ( <b>10</b> ), -3504 ( <b>13</b> ), -3909 ( <b>7</b> ) |
|                       |                                                                          | -50 °C | 4.07 (br), <sup>c</sup> 11.4 <sup>b</sup>  | -3110 ( <b>10</b> ), -3441 ( <b>10</b> ), -3541 ( <b>13</b> ), -3929 ( <b>7</b> ) |
| 3                     | ~3/4 <sup>th</sup> complete reaction<br>(yield of <b>6+7</b> = 70%)      | RT     | 11.4 <sup>b</sup>                          | -3081 ( <b>10</b> ), -3416 ( <b>10</b> ), -3471 ( <b>6</b> ), -3872 ( <b>7</b> )  |
|                       |                                                                          | -20 °C | 4.15 <sup>b</sup> , 11.4 <sup>b</sup>      | -3100 ( <b>10</b> ), -3433 ( <b>10</b> ), -3501 ( <b>13</b> ), -3909 ( <b>7</b> ) |
|                       |                                                                          | -50 °C | 6.62 <sup>b</sup> , 11.4 <sup>b</sup>      | -3111 ( <b>10</b> ), -3443 ( <b>10</b> ), -3539 ( <b>13</b> ), -3929 ( <b>7</b> ) |
| 4                     | Reaction complete                                                        | RT     |                                            | -3471 ( <b>6</b> ), -3872 ( <b>7</b> )                                            |

<sup>a</sup> Only  $^1\text{H}$  NMR signals additional to those of **6-11** are listed.<sup>b</sup> Weak unresolved signal.<sup>c</sup> Overlaps with methylene signal of **7** at  $\delta$  3.97.

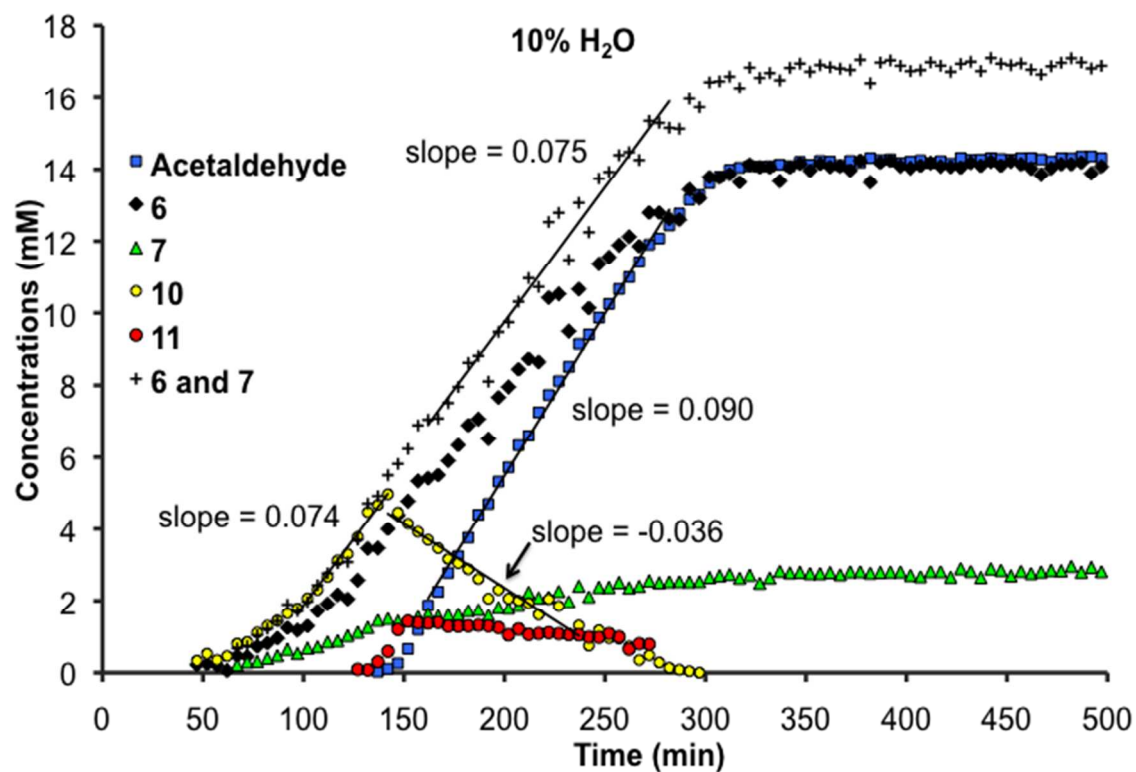

**Figure S1.** Ethylene reaction profile for [Pt(COD)(OH)]<sub>2</sub>[OTf]<sub>2</sub> (**4**) in CD<sub>2</sub>Cl<sub>2</sub> at 27 °C with 10% H<sub>2</sub>O, ([**4**] = 9 mM, [C<sub>2</sub>H<sub>4</sub>] = 200 mM). Slopes are from least squares fits to linear portions of the plots.

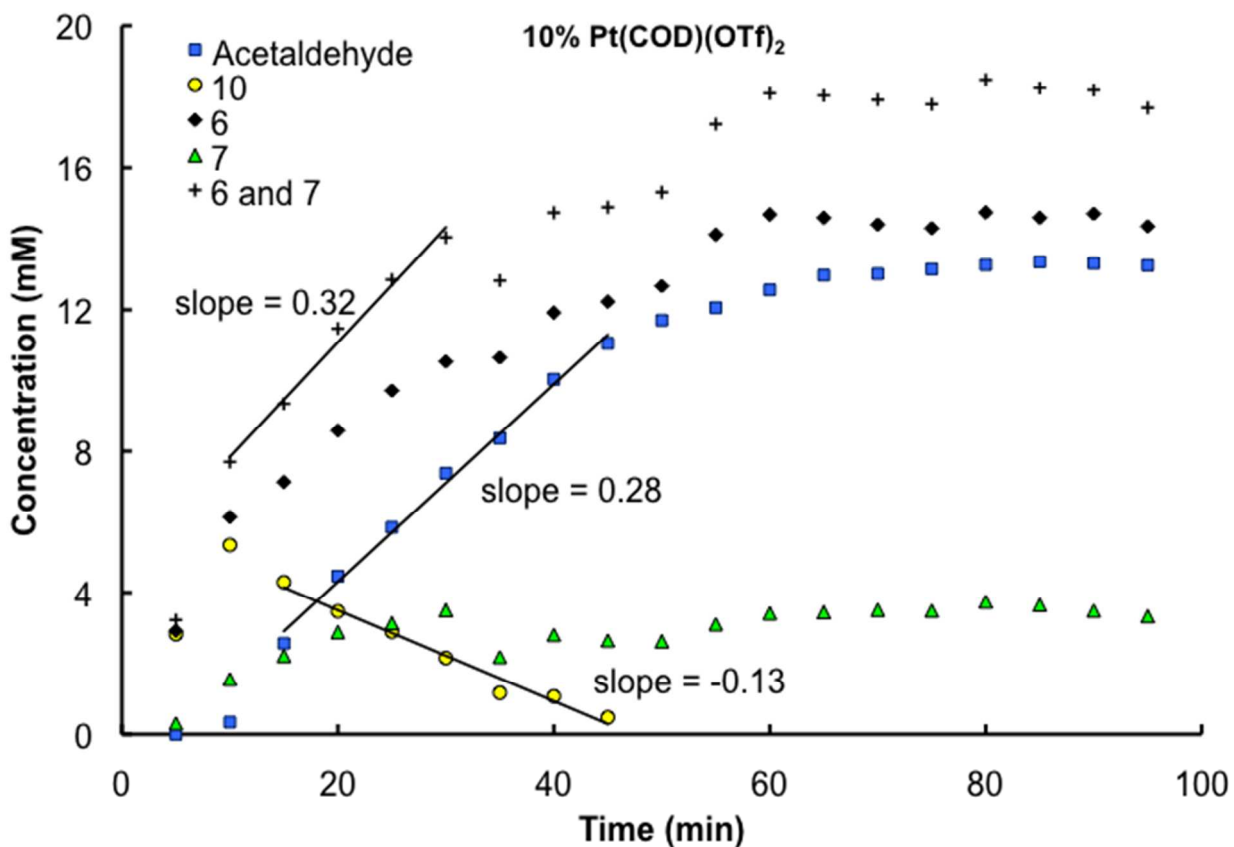

**Figure S2.** Ethylene reaction profile for [Pt(COD)(OH)]<sub>2</sub>[OTf]<sub>2</sub> (**4**) in CD<sub>2</sub>Cl<sub>2</sub> at 27 °C with 10% Pt(COD)(OTf)<sub>2</sub>, ([**4**] = 9 mM, [C<sub>2</sub>H<sub>4</sub>] = 200 mM). Slopes are from least squares fits to linear portions of the plots.

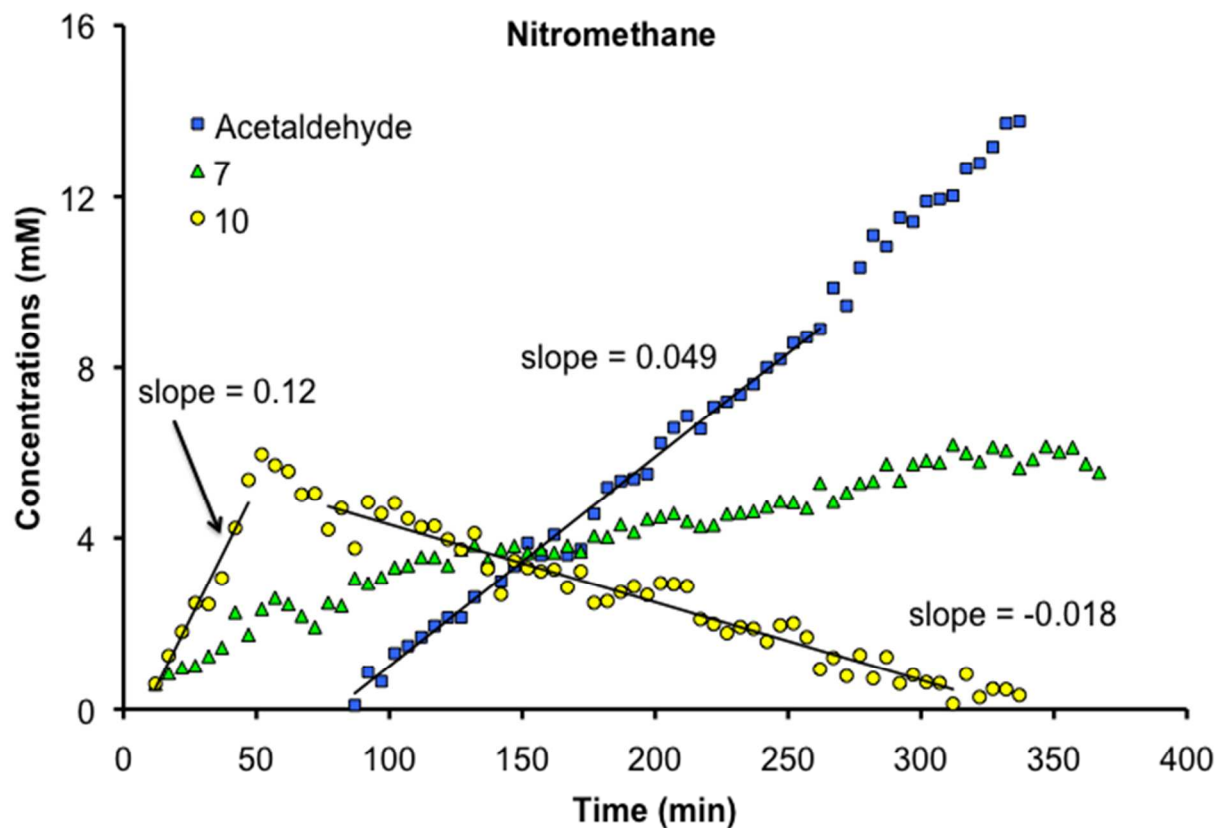

**Figure S3.** Ethylene reaction profile for  $[\text{Pt}(\text{COD})(\text{OH})]_2[\text{OTf}]_2$  (**4**) in  $\text{CD}_3\text{NO}_2$  at  $27^\circ\text{C}$  ( $[\text{4}] = 9 \text{ mM}$ ,  $[\text{C}_2\text{H}_4] \sim 200 \text{ mM}$ ). Slopes are from least squares fits to linear portions of the plots.

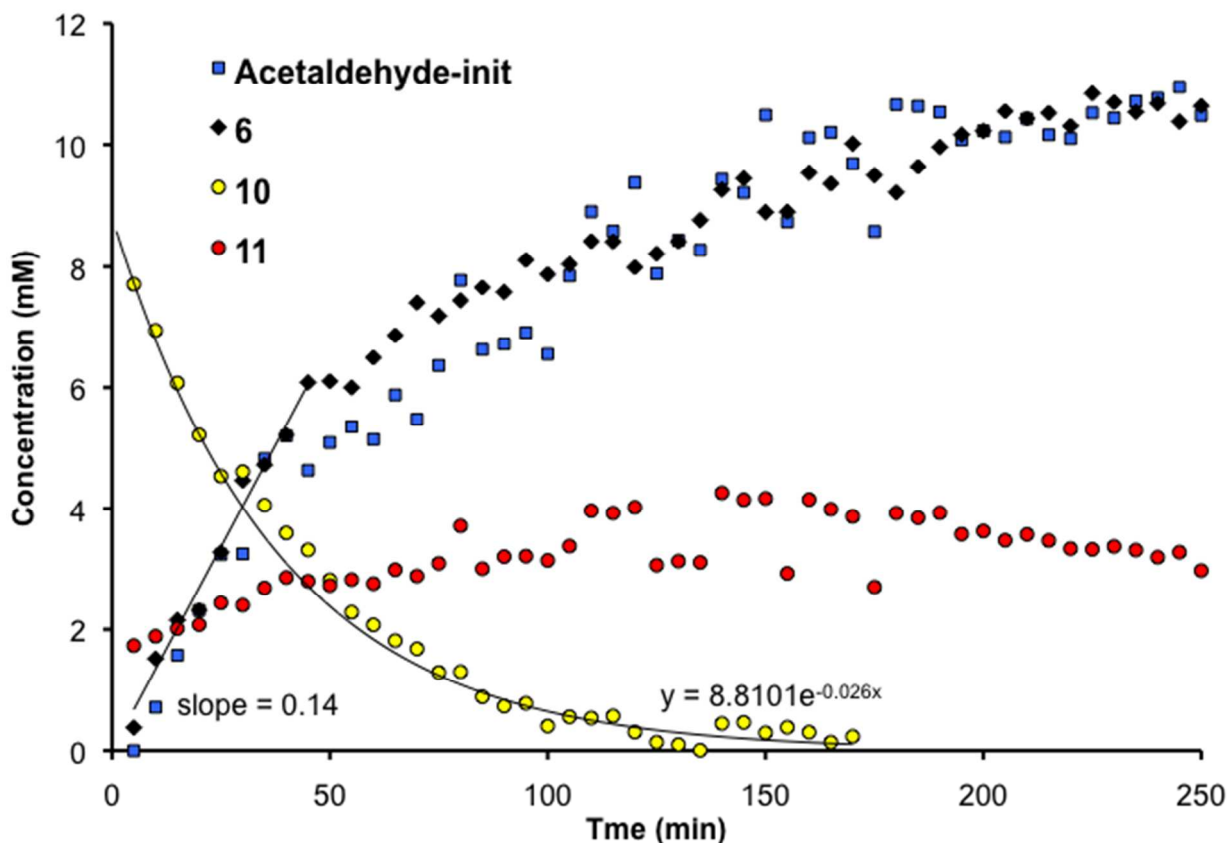

**Figure S4.** Ethylene reaction profile for a 10:1 mixture of 10 and 11 (prepared in situ from 4 (~9 mM) and vinyloxy-trimethylsilane) in  $\text{CD}_2\text{Cl}_2$  at 27 °C with 10% HOTf and  $[\text{C}_2\text{H}_4] = 200 \text{ mM}$ . Acetaldehyde from the preparation of 10 has been subtracted.

**Kinetic fitting and simulations** of phases 1 and 2 used the Copasi program.<sup>1</sup> Ethylene was not included as a parameter as its concentration is constant (excess).

Abbreviations:

BT =  $\text{Pt}(\text{COD})(\text{OTf})_2$

C = catalyst =  $\text{H}^+$

CA =  $[\text{Pt}(\text{COD})(\text{OH}_2)(\text{OTf})]^+$

W = water

ET = 6

AA = 4

A =  $\text{Pt}(\text{COD})(\text{OH})(\text{OTf})$

V = 23

I = 10

EH =  $\text{Pt}(\text{COD})(\text{OH})(\text{Et})$

A) Acidic coordinated water model with fitting parameters

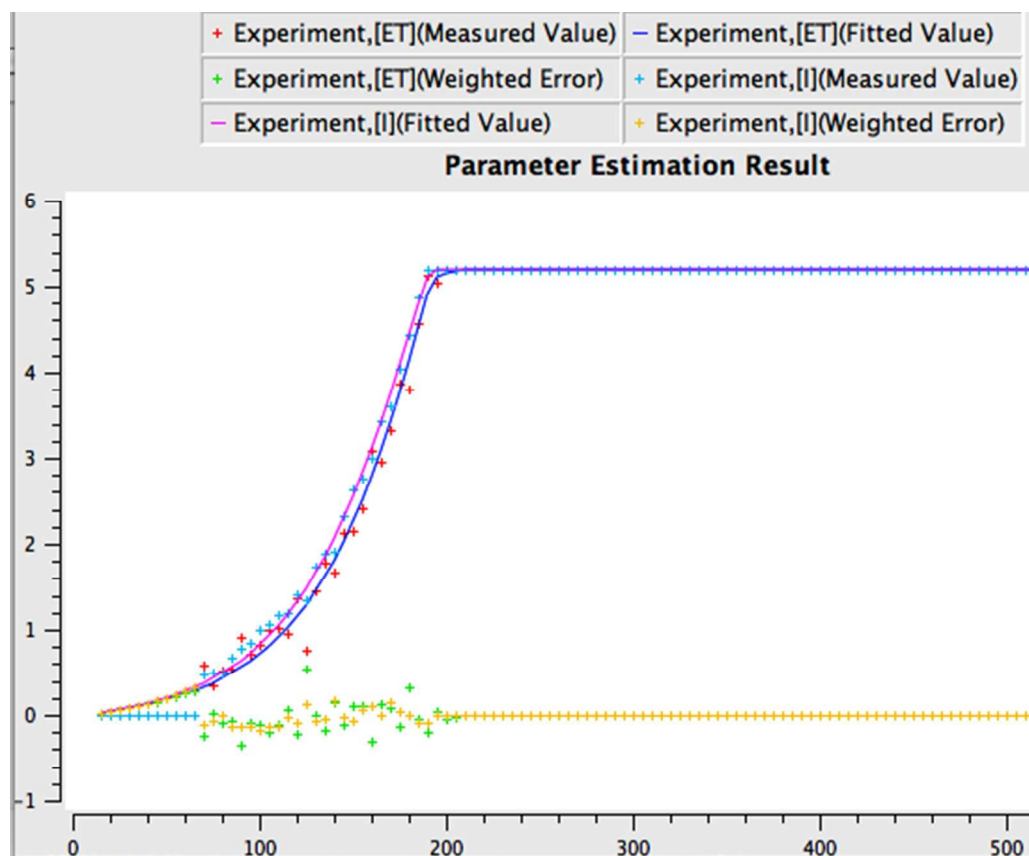

**Figure S5.** Acidic water model fit of phases 1 and 2.

**Table S2.** Acidic water model equations.

| # ▲ | Name | Equation                        |
|-----|------|---------------------------------|
| 1   | R1   | $AA + C = A + CA$               |
| 2   | R2   | $A \rightarrow V$               |
| 3   | R3   | $V + AA \rightarrow W + I + ET$ |
| 4   | R4   | $ET + W = EH + C$               |
| 5   | R5   | $CA = A + C$                    |

**Table S3.** Acidic water model initial concentrations.



## Initial Concentrations

|    |       |           |         |
|----|-------|-----------|---------|
| A  | indep | 0         | mmol/ml |
| AA | indep | 9         | mmol/ml |
| C  | indep | 0.0298423 | mmol/ml |
| CA | dep   | 0         | mmol/ml |
| EH | dep   | 0         | mmol/ml |
| ET | indep | 0         | mmol/ml |
| I  | dep   | 0         | mmol/ml |
| V  | indep | 0         | mmol/ml |
| W  | dep   | 0         | mmol/ml |

**Table S4.** Acidic water model fitted parameters.

|   | Parameter | Value       | Std. Deviation | Coeff. of Variation [%] | Gradient    |
|---|-----------|-------------|----------------|-------------------------|-------------|
| 1 | [C]_0     | 0.0298423   | 0.00387925     | 12.9992                 | 8.05699     |
| 2 | (R1).k1   | 58.3114     | 98.607         | 169.104                 | 0.00136543  |
| 3 | (R1).k2   | 9.19174e-09 | 4.26857e-07    | 4643.92                 | 277633      |
| 4 | (R2).k1   | 0.0293634   | 0.00113495     | 3.86519                 | 11.9949     |
| 5 | (R3).k1   | 3.21848e+06 | 2.39385e+08    | 7437.83                 | 6.15097e-10 |
| 6 | (R4).k1   | 0.0780294   | 0.105282       | 134.926                 | 0.957578    |
| 7 | (R4).k2   | 7736.43     | 17166.7        | 221.895                 | 9.05877e-06 |
| 8 | (R5).k1   | 0.115835    | 0.00971665     | 8.38834                 | 5.50601     |
| 9 | (R5).k2   | 2.62463e-05 | 0.00196788     | 7497.74                 | 74.7869     |

|   | Experiment | Objective Value | Root Mean Square | Error Mean | Error Mean Std. Deviation |
|---|------------|-----------------|------------------|------------|---------------------------|
| 1 | Experiment | 1.87042         | 0.0905738        | 0.00654225 | 0.0903372                 |

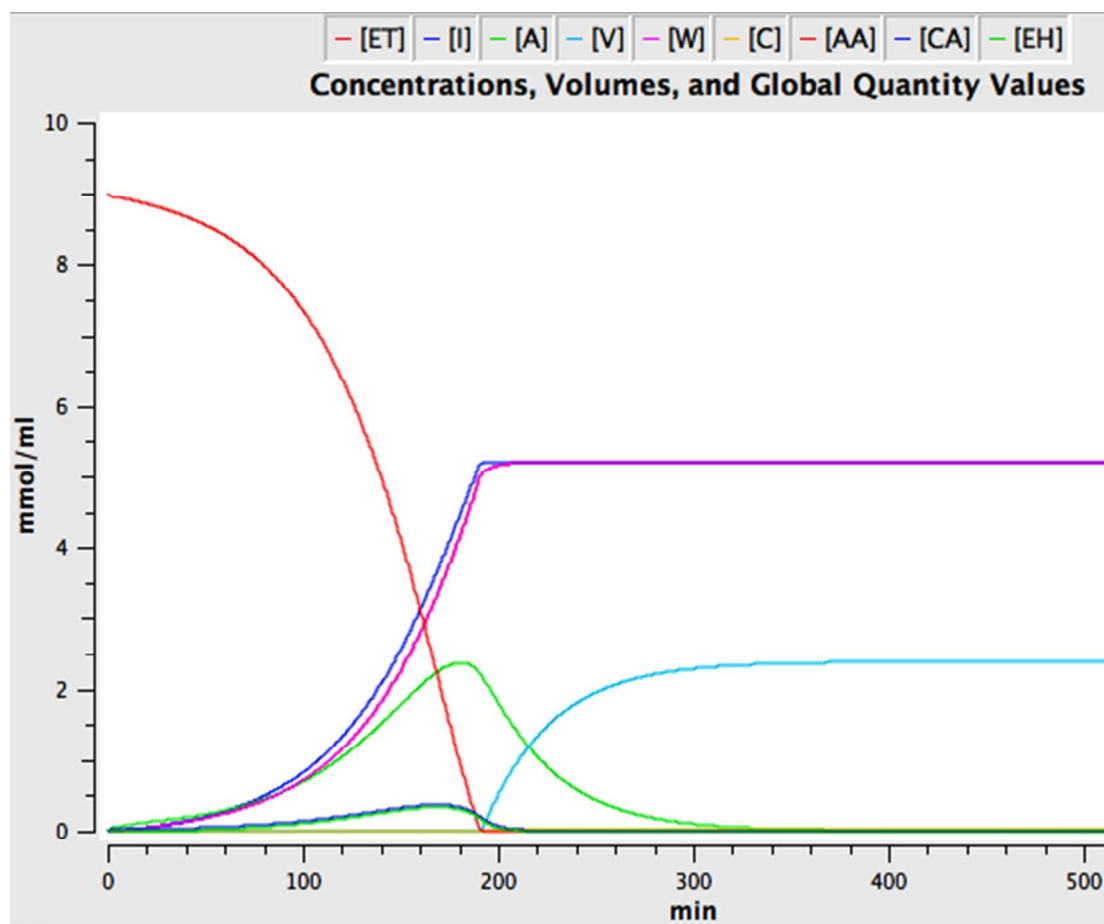

**Figure S6.** Phases 1 and 2 acidic water model simulation using fitted parameters.

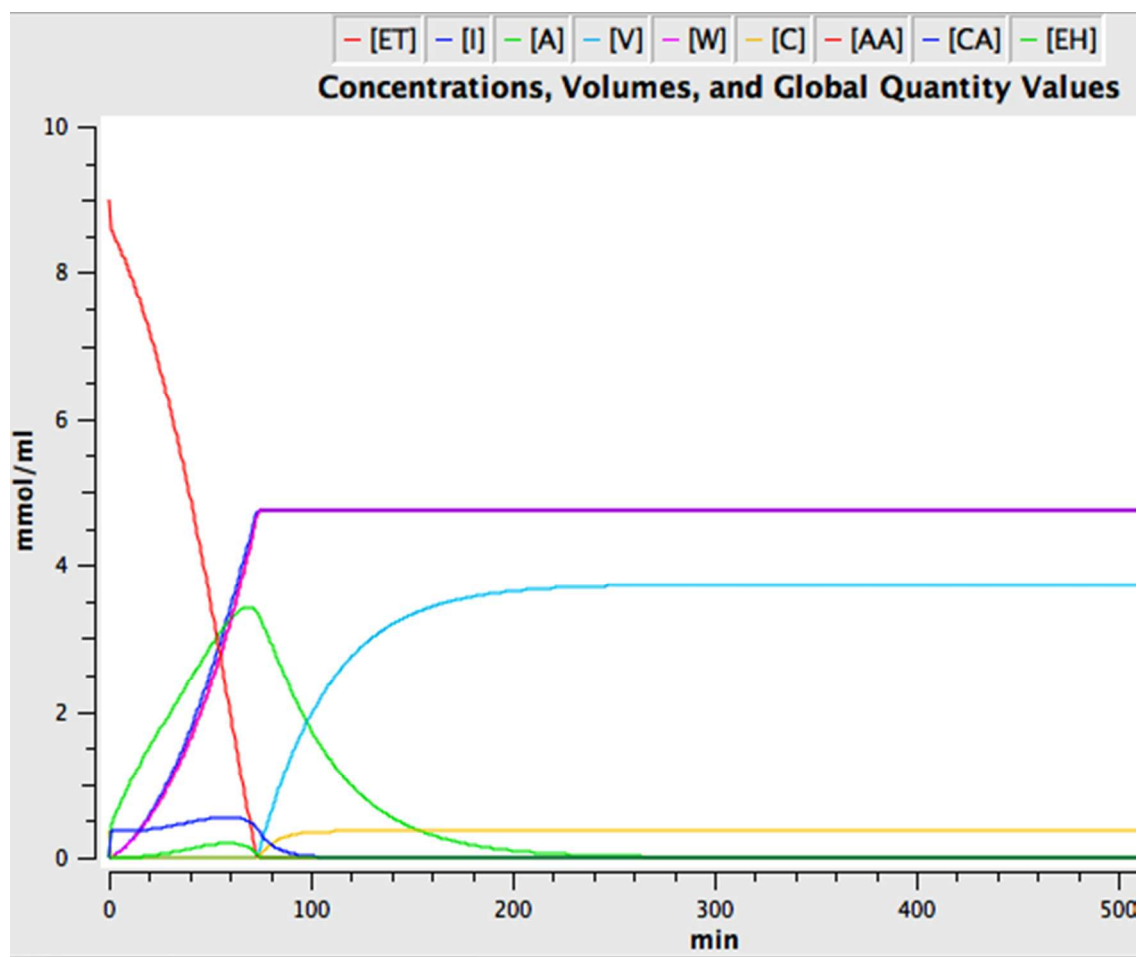

**Figure S7.** Phases 1 and 2 acidic water model simulation with 4%  $\text{H}^+$

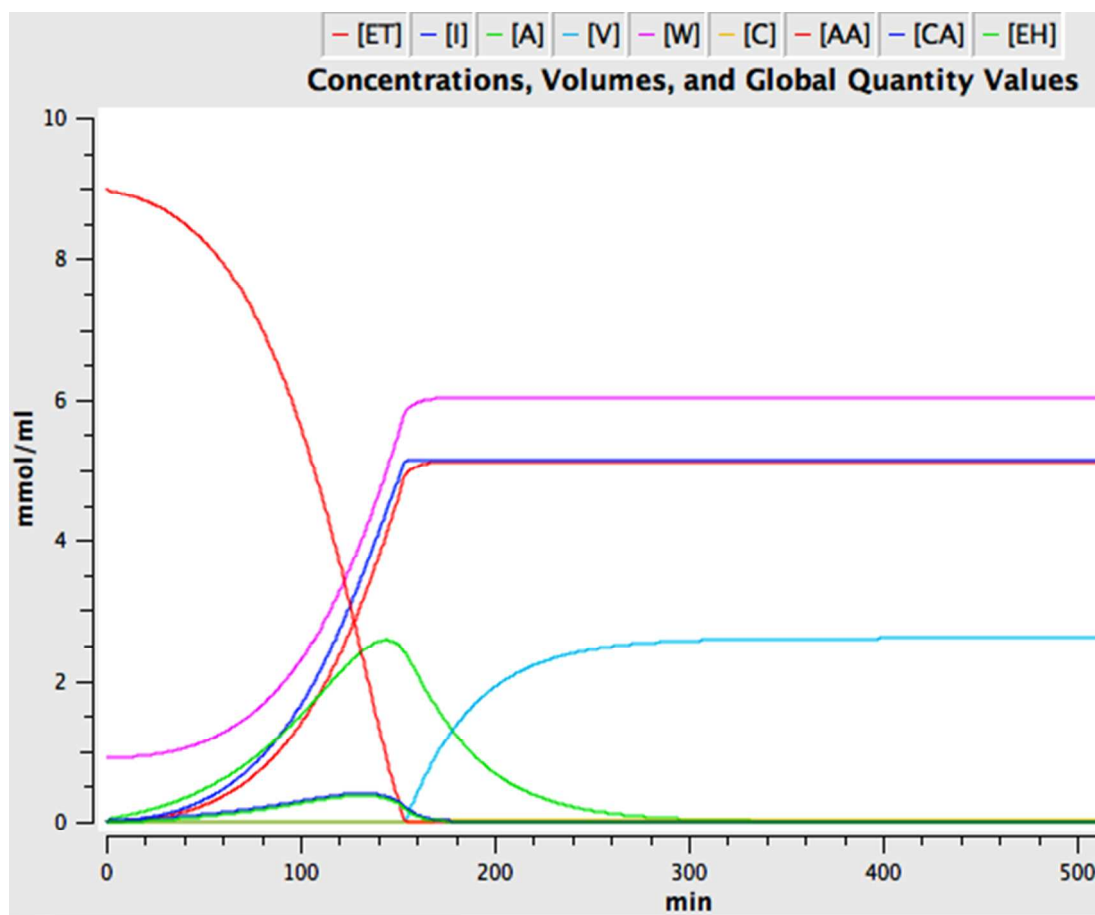

**Figure S8.** Phases 1 and 2 acidic water model simulation with 10% initial water.

B)  $\text{Pt}(\text{COD})(\text{OTf})_2$  (BT) impurity (1%) model with fitted parameters

**Table S5.** Impurity model equations.

| # ▲ | Name | Equation                                                           |
|-----|------|--------------------------------------------------------------------|
| 1   | R1   | $\text{BT} \rightarrow \text{C} + \text{ET}$                       |
| 2   | R2   | $\text{AA} + \text{C} \rightarrow \text{A} + \text{CA}$            |
| 3   | R3   | $\text{A} \rightarrow \text{V}$                                    |
| 4   | R4   | $\text{V} + \text{AA} \rightarrow \text{W} + \text{I} + \text{ET}$ |
| 5   | R5   | $\text{CA} = \text{C} + \text{A}$                                  |

**Table S6.** Impurity model initial concentrations.

| Initial Concentrations |       |      |         |  |
|------------------------|-------|------|---------|--|
| A                      | indep | 0    | mmol/ml |  |
| AA                     | dep   | 9    | mmol/ml |  |
| BT                     | dep   | 0.09 | mmol/ml |  |
| C                      | indep | 0    | mmol/ml |  |
| CA                     | indep | 0    | mmol/ml |  |
| ET                     | indep | 0    | mmol/ml |  |
| I                      | dep   | 0    | mmol/ml |  |
| V                      | indep | 0    | mmol/ml |  |
| W                      | dep   | 0    | mmol/ml |  |

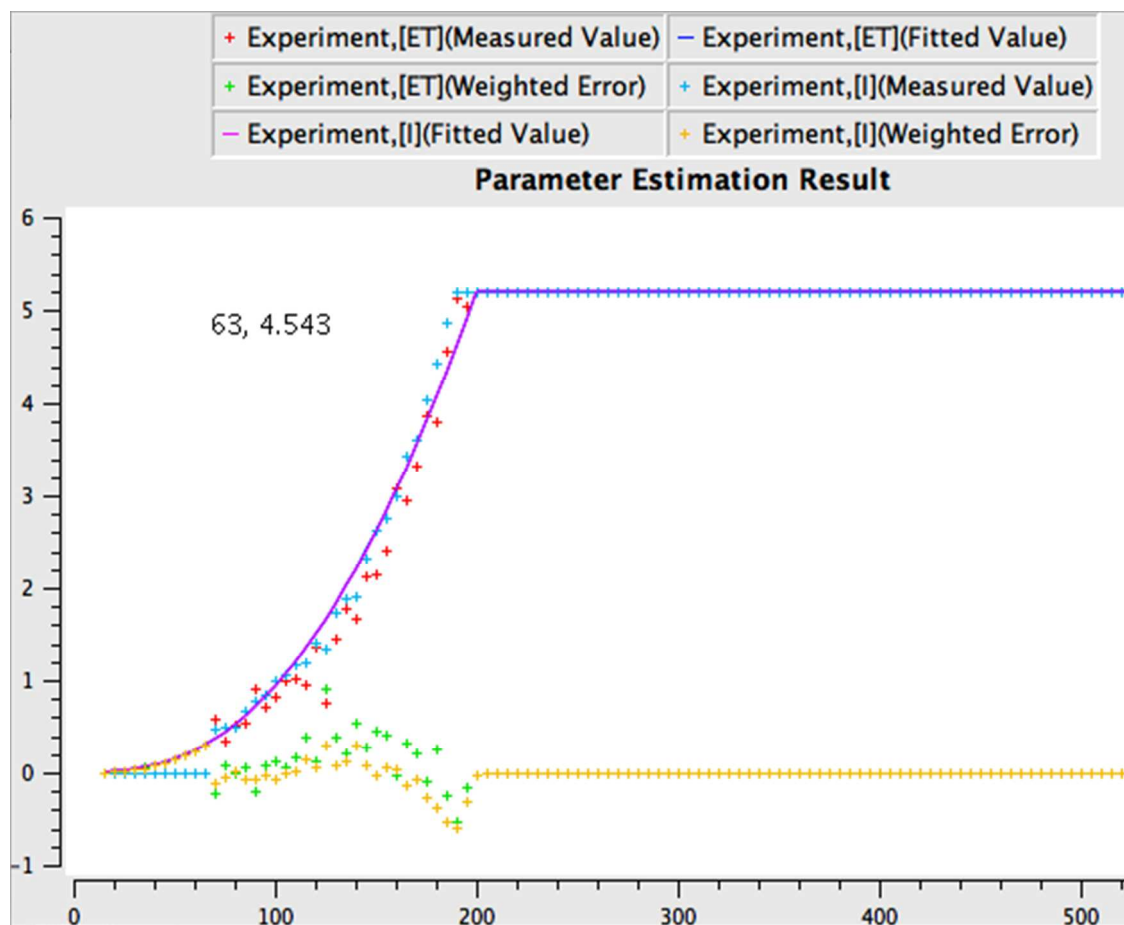**Figure S9.** Impurity model fit of phases 1 and 2 (1% BT).**Table S7.** Impurity model fitted parameters.

|   | Parameter | Value       | Std. Deviation | Coeff. of Variation [%] | Gradient     |
|---|-----------|-------------|----------------|-------------------------|--------------|
| 1 | (R1).k1   | 1.28502e-05 | 0.000399817    | 3111.37                 | 30474.5      |
| 2 | (R2).k1   | 1355.95     | 41706.9        | 3075.84                 | -8.75147e-06 |
| 3 | (R3).k1   | 0.0229481   | 0.0032591      | 14.202                  | 6.64666      |
| 4 | (R4).k1   | 1.7758e+09  | 1.92549e+11    | 10842.9                 | 1.37983e-12  |
| 5 | (R5).k1   | 175.514     | 5459.97        | 3110.85                 | 0.00214044   |

|   | Experiment | Objective Value | Root Mean Square | Error Mean | Error Mean Std. Deviation |
|---|------------|-----------------|------------------|------------|---------------------------|
| 1 | Experiment | 4.36164         | 0.138311         | 0.0153077  | 0.137462                  |

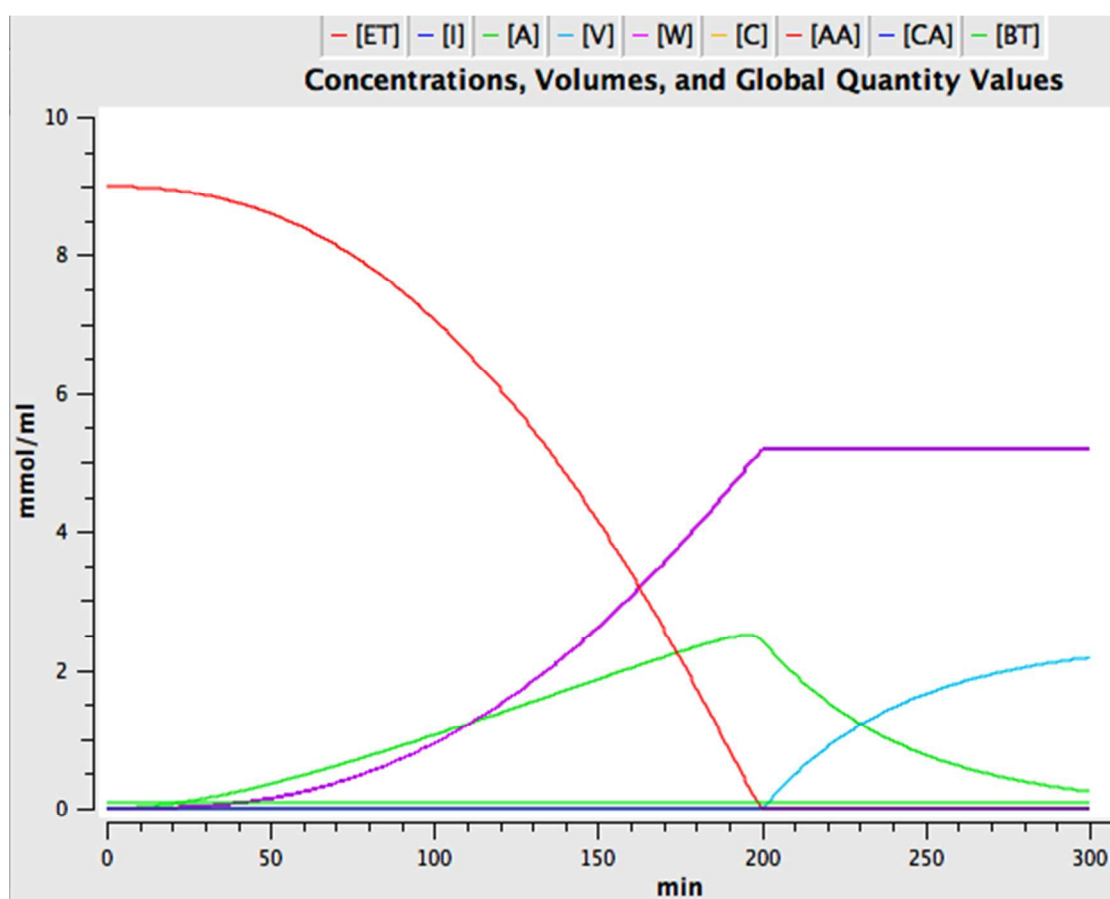

**Figure S10.** Phases 1 and 2 impurity model simulation using fitted parameters (1% BT).

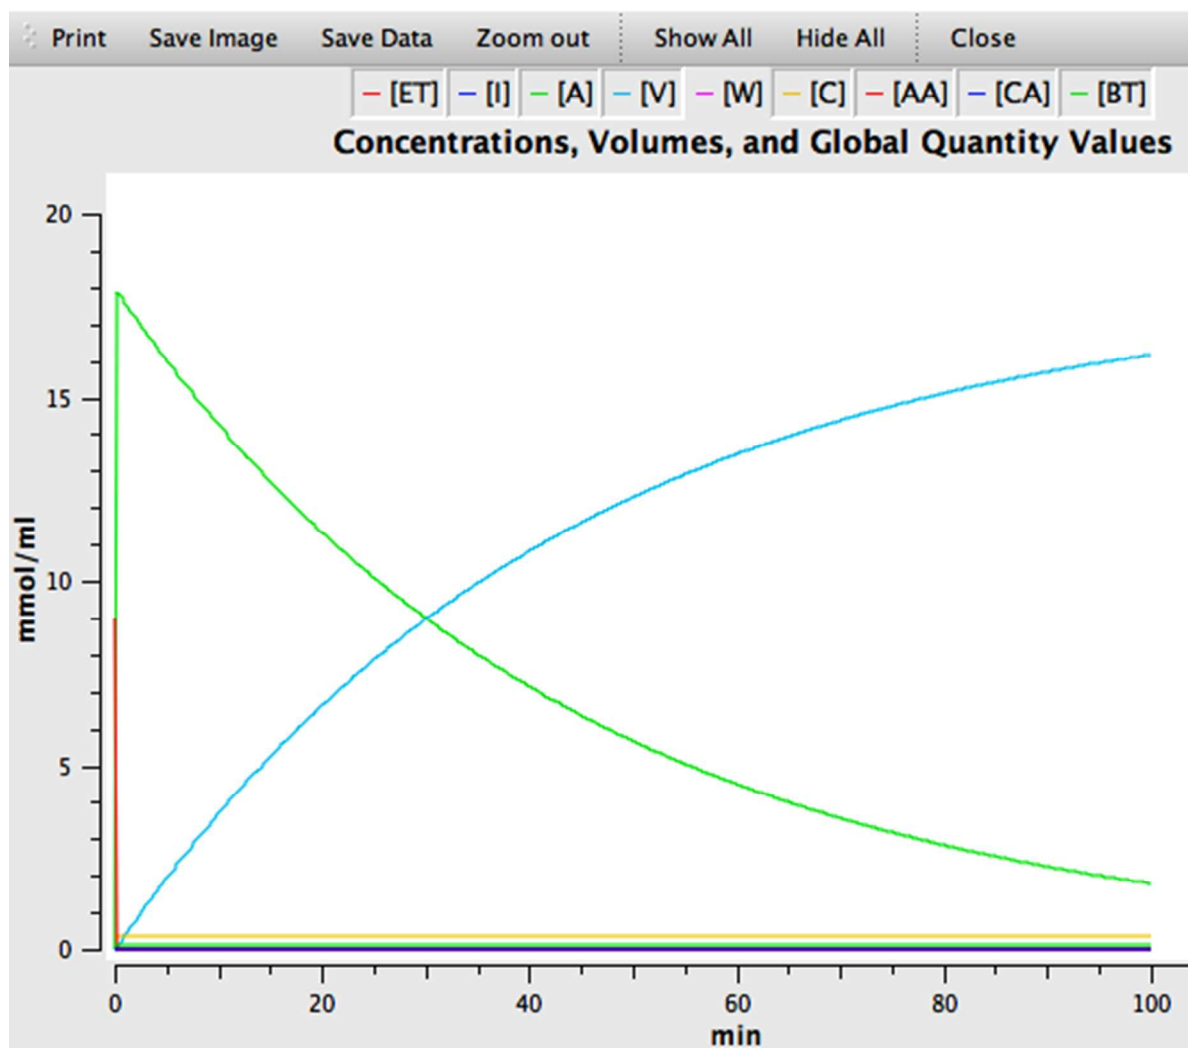

**Figure S11.** Phases 1 and 2 impurity model simulation with 4%  $\text{H}^+$  (1% BT). Upper green line is monomer A. Dimer AA (**4**) is consumed in less than 1 min.

## Experimental

**General Procedures.** All experiments were conducted under a dinitrogen atmosphere in a Vacuum Atmosphere Corporation drybox unless otherwise noted. Solvents were dried under standard techniques and were stored in the drybox, over 4Å molecular sieves or sodium metal. Chemicals were purchased from the following companies: Ethylene from Scott Specialty Gases, propylene from Linweld Lincoln,  $\text{CD}_3\text{NO}_2$  from Acros, and HOTf and polymerbound base- $\text{NEt}_2$  (100-200 mesh, 1% cross linked, typical loading 1.0-1.5 mmol/g) were purchased from Aldrich.  $\text{CD}_2\text{Cl}_2$  was purchased from Cambridge Isotope Laboratories. All commercial chemicals were used as received. Corannulene,<sup>2</sup>  $[\text{Pt}(\text{COD})(\text{OH})_2][\text{OTf}]_2$  (**4**),<sup>3</sup>  $\text{Pt}(\text{COD})\text{Et}_2$ ,<sup>4</sup> and

$\text{Pt}(\text{COD})(\text{OTf})_2^5$  were synthesized according to literature procedures. NMR spectra were recorded on Bruker AMX -300 or -500 spectrometers at ambient temperatures except where noted. All NMR chemical shifts ( $\delta$ ) are reported in ppm with coupling constants in Hz.  $^1\text{H}$  NMR chemical shifts are relative to protio solvent signals referenced to TMS (0 ppm),  $^{13}\text{C}$  NMR chemical shifts are relative to internal solvent signals referenced to TMS (0 ppm) and  $^{195}\text{Pt}$  NMR chemical shifts are relative to external  $\text{K}_2\text{PtCl}_4/\text{D}_2\text{O}$  (-1,624 ppm).

**Acetaldehyde yield determination.** In the following reactions the amount of acetaldehyde was determined by integration of the aldehydic proton signal at  $\delta$  9.75. In many cases the yield thus obtained appeared to be unreasonably low and we suspected signal saturation from a long relaxation time for the aldehydic proton. This was confirmed for an  $\text{O}_2$ -free sample of acetaldehyde in  $\text{CDCl}_3$ . The T1 of the aldehydic proton was found to be 23 s. To overcome the integration error caused by this long relation time we determined a correction factor by integrating both the methyl group and the aldehydic proton of acetaldehyde under conditions similar to those used in the experiments below. Assigning an integration value of 3 to the methyl group gave an integration value of 0.7 for the aldehydic proton. Therefore, all of the aldehydic proton integration values for the experiments below have been divided by 0.7.

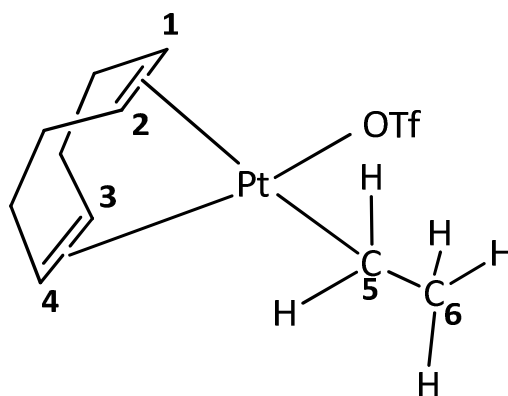

Atom labeling for the NMR data of  $(\text{COD})\text{Pt}(\text{Et})(\text{OTf})$  (**6**)

**$\text{Pt}(\text{COD})(\text{Et})(\text{OTf})$  (**6**).** Inside the drybox, HOTf (20.7  $\mu\text{L}$ , 0.234 mmol) was added to a yellow solution of  $\text{Pt}(\text{COD})(\text{Et})_2$  (85.0 mg, 0.235 mmol) in 0.45 mL  $\text{CD}_2\text{Cl}_2$  in a screw cap NMR tube. The contents were mixed and immediately the solution turned dark red and  $\text{Pt}(\text{COD})(\text{Et})(\text{OTf})$  (**6**) was formed in over 90% yield, accompanied by evolution of ethane. Also signals for trace amounts of  $(\text{COD})\text{Pt}(\text{OTf})_2$  and a Pt-hydride complex (see text) were found. Complex **6** was characterized by  $^1\text{H}$ ,  $^{13}\text{C}$ , DEPT,  $^1\text{H}$ - $^{13}\text{C}$  HMQC and  $^{195}\text{Pt}$  NMR spectroscopy. Upon standing in solution **6** decomposes to give  $\text{Pt}(\text{COD})(\text{OTf})_2$  and ethane.

$^1\text{H}$  NMR (500 MHz,  $\text{CD}_2\text{Cl}_2$ ): 5.81 (m with Pt satellites,  $J_{\text{Pt-H}} = 24.5$  Hz, 2H, COD CH's 1 & 2) 4.41 (m with Pt satellites,  $J_{\text{Pt-H}} = 97.5$  Hz, 2H, COD CH's 3 & 4), 2.6 - 2.2 (m, 8H, COD  $\text{CH}_2$ ), 1.54 (q with Pt satellites,  $J_{\text{H5-H6}} = 7.5$  Hz,  $J_{\text{Pt-H}} = 70.0$  Hz, 2H,  $\text{CH}_3\text{CH}_2$  at 5), 0.89 (t,  $J_{\text{H5-H6}} = 7.5$  Hz, 3H,  $\text{CH}_3\text{CH}_2$  at 6),  $^{13}\text{C}$  NMR (126 MHz,  $\text{CD}_2\text{Cl}_2$ ) 116.9 (s with Pt



satellites,  $J_{\text{Pt-C}} = 21.1$ , COD 1 & 2), 79.7 (s with Pt satellites,  $J_{\text{Pt-C}} = 294.3$ , COD 3 & 4), 31.3, 27.2 (COD methylenes), 21.4 (s with Pt satellites,  $J_{\text{Pt-C}} = 584.5$ ,  $\text{CH}_3\text{CH}_2$  at 5), 14.2 (s,  $\text{CH}_3\text{CH}_2$  at 6),  $^{195}\text{Pt}$  NMR (64 MHz,  $\text{CD}_2\text{Cl}_2$ ): -3469 (s). Observation of ethane,  $^1\text{H}$  NMR (500 MHz,  $\text{CD}_2\text{Cl}_2$ ): 0.84 (s). Signal for Pt-H:  $^1\text{H}$  NMR (500 MHz,  $\text{CD}_2\text{Cl}_2$ ): -1.96 (s, with Pt satellites  $J_{\text{Pt-H}} = 775.5$  Hz). Characteristic signals for  $(\text{COD})\text{Pt}(\text{OTf})_2$ :  $^1\text{H}$  NMR (500 MHz,  $\text{CD}_2\text{Cl}_2$ ): 6.27 (s with Pt satellites  $J_{\text{Pt-H}} = 78.4$  Hz) and  $^{195}\text{Pt}$  NMR (64 MHz,  $\text{CD}_2\text{Cl}_2$ ): -2990 (s).

**Pt(COD)(Et)(OTf) (6) with added  $\text{C}_2\text{H}_4$ :  $[\text{Pt}(\text{COD})(\text{Et})(\text{C}_2\text{H}_4)](\text{OTf})$  (7).** Similar to the above procedure a sample of **6** was prepared in a screw cap NMR tube from a reaction between HOTf (6.0  $\mu\text{L}$ , 0.069 mmol) and  $(\text{COD})\text{Pt}(\text{Et})_2$  (25.0 mg, 0.069 mmol) in 0.55 mL  $\text{CD}_2\text{Cl}_2$ . Ethylene (3.2 mL) was injected via the screw cap septum and the contents thoroughly mixed. The solution remained dark red. In this case complex **6** remains stable for days.  $[\text{Pt}(\text{COD})(\text{Et})(\text{C}_2\text{H}_4)](\text{OTf})$  (**7**) is present as evident from the upfield peaks in the  $^1\text{H}$  NMR (300 MHz) at 0.41 (q,  $J_{\text{H-H}} = 7.5$ ,  $J_{\text{Pt-H}} = 84.5$ ,  $\text{CH}_3\text{CH}_2$ ) and -0.33 (t,  $J_{\text{H-H}} = 7.5$ ,  $J_{\text{Pt-H}} = 42.5$ ,  $\text{CH}_3\text{CH}_2$ ) and  $^{195}\text{Pt}$  NMR (64 MHz,  $\text{CD}_2\text{Cl}_2$ ): -3874. At -20°C,  $^{195}\text{Pt}$  NMR (64 MHz,  $\text{CD}_2\text{Cl}_2$ ): -3483 (s). At -50°C,  $^{195}\text{Pt}$  NMR (64 MHz,  $\text{CD}_2\text{Cl}_2$ ): -3493 (s). The mixture was also studied by EXSY in a 300-AMX probe at ambient temperature (see text).

**Complexes 6 and 7 with added  $\text{H}_2\text{O}$ .** The above NMR tube with contents was opened outside the drybox and immediately de-ionized  $\text{H}_2\text{O}$  (15.0  $\mu\text{L}$ , 0.083 mmol) was added. The screw cap was closed and ethylene (2.0 mL) was injected via the screw cap septum. The contents were thoroughly mixed by shaking. The resulting mixture was characterized by  $^1\text{H}$ ,  $^{13}\text{C}$ , DEPT,  $^1\text{H}$ - $^{13}\text{C}$ , HMQC, EXSY and  $^{195}\text{Pt}$  NMR spectroscopy.  $^1\text{H}$  NMR analysis showed signals for **6** and **7** and the following additional signals.  $^1\text{H}$  NMR (300 MHz,  $\text{CD}_2\text{Cl}_2$ ): 3.45 (s, br), 3.17 (s with Pt satellites  $J_{\text{Pt-H}} = 56.7$  Hz).  $^{195}\text{Pt}$  NMR (64 MHz,  $\text{CD}_2\text{Cl}_2$ ): -3543 (s), -3872 (s, trace), -3990 (s, br). At -20°C:  $^{195}\text{Pt}$  NMR (64 MHz,  $\text{CD}_2\text{Cl}_2$ ): -3555 (s), -3913 (s, trace), -4039 (s, trace). At -50°C:  $^{195}\text{Pt}$  NMR (64 MHz,  $\text{CD}_2\text{Cl}_2$ ): -3560 (s), -3928 (s, trace), -4057 (s, trace)

**Ethylene reaction profiles for  $[\text{Pt}(\text{COD})(\text{OH})]_2(\text{OTf})_2$  (**4**) in  $\text{CD}_2\text{Cl}_2$ .** The following experiments were performed using the same batch of **4** and of the same  $\text{CD}_2\text{Cl}_2$ . Corannulene was added as an integration standard. **(A) Control:** Outside the drybox, corannulene (0.9 mg, 0.004 mmol) was measured into a screw cap NMR tube. The tube was taken into the drybox and **4** (5.0 mg, 0.0053 mmol) was added. The solids were dissolved in 0.65 mL  $\text{CD}_2\text{Cl}_2$  and the tube was sealed, removed from the drybox and placed in a dry ice/acetone bath. Ethylene (3.6 mL, 0.15 mmol) was injected via the screw cap septum. The NMR tube was taken out of the bath, the contents were mixed well by shaking and the tube was immediately placed in the NMR probe (AMX-300 MHz) at ambient temperature. The ensuing reaction was monitored by  $^1\text{H}$  NMR spectroscopy. **(B) 10 %  $\text{H}_2\text{O}$ :** A solution of **4** (5.0 mg, 0.0053 mmol) and corannulene (1.3 mg, 0.0052 mmol) in 0.65 mL  $\text{CD}_2\text{Cl}_2$  was prepared similar to the above procedure. The NMR tube was taken out from the drybox and  $\text{H}_2\text{O}$  (2.0  $\mu\text{L}$  of a freshly prepared

solution of 20  $\mu\text{L}$  of  $\text{H}_2\text{O}$  in 4000  $\mu\text{L}$  of  $\text{CDCl}_3$ ) was added through the screw cap septum. The tube was then placed in a dry ice/acetone bath. Ethylene addition and reaction monitoring were similar to that described in A. **(C) 4% HOTf:** A solution of **4** (5.0 mg, 0.0053 mmol) and corannulene (1.5 mg, 0.0059 mmol) in 0.65 mL  $\text{CD}_2\text{Cl}_2$  was prepared similarly to the above procedure. HOTf (2.0  $\mu\text{L}$  of a freshly prepared 0.011 M stock solution of HOTf in  $\text{CDCl}_3$ ) was added. The tube was then placed in a dry ice/acetone bath. Ethylene addition and reaction monitoring were similar to that described in A. **(D) 10% (COD)Pt(OTf)<sub>2</sub>:** A solution of **4** (5.0 mg, 0.0053 mmol) and corannulene (0.9 mg, 0.004 mmol) in 0.65 mL  $\text{CD}_2\text{Cl}_2$  was prepared similar to the above procedure. (COD)Pt(OTf)<sub>2</sub> (32.0  $\mu\text{L}$  of a freshly prepared 0.017 M stock solution in  $\text{CDCl}_3$ ) was added at 25°C. Ethylene addition and reaction monitoring were similar to that described in A. **(E) Low ethylene concentration:** A solution of **4** (5.0 mg, 0.0053 mmol) and corannulene (0.8 mg, 0.0032 mmol) in 0.65 mL  $\text{CD}_2\text{Cl}_2$  was prepared in a screw cap NMR tube. The tube was placed in a dry ice/acetone bath and ethylene (1.0 mL, 0.041 mmol) was injected via the screw cap septum. The NMR tube was taken out from the cold bath, the contents were mixed well by shaking and the tube was immediately placed in the NMR probe (AMX-300MHz) at ambient temperature. The ensuing reaction was monitored by  $^1\text{H}$  NMR spectroscopy.

**Ethylene reaction profile for [Pt(COD)(OH)]<sub>2</sub>(OTf)<sub>2</sub> (**4**) in  $\text{CD}_3\text{NO}_2$ :** Following a procedure similar to that for  $\text{CD}_2\text{Cl}_2$  above, a  $^1\text{H}$  NMR reaction profile was obtained in  $\text{CD}_3\text{NO}_2$  (0.50 mL) with corannulene (1.1 mg, 0.0044 mmol), **4** (5.0 mg, 0.0053 mmol) and ethylene (4.0 mL). After 48 h, the volatiles were removed and the resulting yellow residue was dissolved in acetone- $d_6$  and the residue characterized by  $^1\text{H}$  and  $^{195}\text{Pt}$  NMR spectroscopy at -60°C. Allyl complex [Pt(COD)( $\eta^3$ -CH<sub>2</sub>CHCHCH<sub>3</sub>)]OTf was detected as the only Pt containing product.

**Ethylene reaction of [Pt(COD)(OH)]<sub>2</sub>(OTf)<sub>2</sub> (**4**): Variable temperature  $^1\text{H}$  and  $^{195}\text{Pt}$  NMR spectroscopy.** Similar to the above procedure a  $\text{CD}_2\text{Cl}_2$  solution of **4** (5.0 mg, 0.0053 mmol) and corannulene (1.2 mg, 0.0048 mmol) was prepared in a screw cap NMR tube and ethylene (4.0 mL) was injected via the screw cap septum at RT. The contents were mixed well by shaking and the tube was placed in the NMR probe (AMX-300 MHz). After ~1 h the reaction was examined at ambient temperature, 0 °C and -50 °C. The probe and sample were warmed to 27 °C to allow the reaction to continue. After ~25 min  $^1\text{H}$  NMR spectroscopy showed that **4** had been consumed to produce Pt(COD)(Et)(OTf) (**6**), [Pt(COD)(Et)(C<sub>2</sub>H<sub>4</sub>)]OTf (**7**) (Yield of **6** plus **7** = 50%), [Pt<sub>2</sub>(COD)<sub>2</sub>( $\mu$ -OH){ $\mu$ - $\kappa^2$ -C,O-CH<sub>2</sub>C(O)H}](OTf)<sub>2</sub> (**10**) and (COD)Pt(CH<sub>2</sub>C(O)H)(OTf) (**11**). At this point the probe and sample were cooled and the sample was analyzed at -20 °C and -50 °C. The probe and sample were then warmed to 27 °C to allow the reaction to continue. After ~1 h,  $^1\text{H}$  NMR analysis at 27 °C showed ~ 70% yield of **6** plus **7**. The probe and sample were cooled and the sample was again analyzed at -20°C and -50°C.

**Ethylene reaction of [Pt(COD)(OH)]<sub>2</sub>(OTf)<sub>2</sub> (**4**): Exchange Spectroscopy (EXSY).** Inside the dry box, a solution of **4** (12.0 mg, 0.0128 mmol) in 0.5 mL  $\text{CD}_2\text{Cl}_2$  was prepared in a screw cap NMR tube. The tube was removed from the dry box and ethylene (2.20 mL) was injected via the screw cap septum. Approximately 1.5 h later, all

**4** was consumed to produce (COD)Pt(Et)(OTf) (**6**), [(COD)Pt(Et)(C<sub>2</sub>H<sub>4</sub>)]OTf (**7**), [Pt<sub>2</sub>(COD)<sub>2</sub>(μ-OH){μ-κ<sup>2</sup>-C,O-CH<sub>2</sub>C(O)H}](OTf)<sub>2</sub> (**10**) and (COD)Pt(CH<sub>2</sub>C(O)H)(OTf) (**11**) as evidenced by <sup>1</sup>H NMR spectroscopy. The sample was then examined by EXSY in the 500-AMX NMR probe.

**Ethylene reaction of [Pt(COD)(OH)]<sub>2</sub>(OTf)<sub>2</sub> (**4**): Effect of HOTf on the yield of acetaldehyde.** The following reactions were performed using the same batch of **4** and the same CD<sub>2</sub>Cl<sub>2</sub>. Acetaldehyde yields are reported with respect to the sum of (COD)Pt(Et)(OTf) (**6**) and [(COD)Pt(Et)(C<sub>2</sub>H<sub>4</sub>)]OTf (**7**) (assumed 100% yield). **(A) 1 equiv of HOTf:** Inside the dry box, a solution of **4** (6.0 mg, 0.0064 mmol) in 0.62 mL CD<sub>2</sub>Cl<sub>2</sub> was prepared in a screw cap NMR tube and neat HOTf (0.6 μL, 0.007 mmol) was added. <sup>1</sup>H NMR spectroscopy (AMX-300) showed broad peaks at δ 9.4 and δ 6.9 and the formation of Pt(COD)(OTf)<sub>2</sub> (δ 6.26 s, J<sub>Pt-H</sub> = 80.1 Hz, COD CH's and 2.87-2.26 COD CH<sub>2</sub>'s). <sup>195</sup>Pt NMR spectroscopy (64 MHz) confirmed the presence of Pt(COD)(OTf)<sub>2</sub> (δ -2989). The tube was taken out of the drybox, and ethylene (3.0 mL) was injected through the screw cap septum. The contents were well mixed by shaking and allowed to react for 24 hr at 25°C (acetaldehyde yield = 17%). **(B) 20% HOTf:** Similarly a solution of **4** (6.0 mg, 0.0064 mmol) in 0.70 mL CD<sub>2</sub>Cl<sub>2</sub> was prepared in a screw cap NMR tube and HOTf (2.2 μL of a freshly prepared 0.59 M stock solution in CDCl<sub>3</sub>) was introduced. <sup>1</sup>H NMR spectroscopy showed that the peaks for **4** had broadened. The tube was placed in a dry ice/acetone bath and ethylene (3.0 mL, 0.12 mmol) was injected via the screw cap septum. Similar to the above procedure, the contents were mixed and the reaction was monitored by <sup>1</sup>H NMR spectroscopy at ambient temperature (acetaldehyde yield = 43 %). **(C) 10% HOTf:** As before a solution of **4** (6.0 mg, 0.0064 mmol) in 0.70 mL CD<sub>2</sub>Cl<sub>2</sub> was prepared in a screw cap NMR tube and HOTf (1.1 μL of a freshly prepared 0.59 M stock solution in CDCl<sub>3</sub>) was introduced. The tube was placed in a dry ice/acetone bath and ethylene (3.0 mL) was injected via the screw cap septum. The contents were mixed by shaking and immediately placed in the NMR probe (AMX-300MHz) at ambient temperature. The reaction was monitored by <sup>1</sup>H NMR spectroscopy and was completed within an hour (acetaldehyde yield = 71%).

**Ethylene reaction of [Pt(COD)(OH)]<sub>2</sub>(OTf)<sub>2</sub> (**4**): Effect of ~NEt<sub>2</sub>.** The effect of the base was tested by adding it at different stages of the reaction. **(A) Initial:** Inside the drybox, ~ 2 mg of polymer-bound base-NEt<sub>2</sub> was added to a pale yellow solution of **4** (6.0 mg, 0.0064 mmol) in 0.60 mL CD<sub>2</sub>Cl<sub>2</sub> in a screw cap NMR tube. The contents were mixed by shaking and immediately the solution became deep yellow. Ethylene (3.0 mL) was added at RT by injecting through the screw cap septum. The contents were mixed by shaking and the reaction was monitored by <sup>1</sup>H NMR spectroscopy (300-AMX). Signals for **4** were broadened and after 24 h, a complicated NMR spectrum of unknown compounds resulted. No acetaldehyde was detected. **(B) Halfway through reaction:** Inside the drybox a solution of **4** (4.5 mg, 0.0048 mmol) in 0.45 mL CD<sub>2</sub>Cl<sub>2</sub> was prepared in a screw cap NMR tube and ethylene (1.0 mL) was added via the screw cap septum. Once the reaction had proceeded to make **10** and trace amount of **11** and acetaldehyde (by <sup>1</sup>H NMR spectroscopy) the tube was taken into the drybox. The screw cap top was opened and ~ 2-3 mg of ~NEt<sub>2</sub> was quickly added. The tube was resealed and the mixture was shaken and removed from the drybox. <sup>1</sup>H NMR spectroscopy

confirmed that no significant amount of ethylene had escaped. The reaction was studied by  $^1\text{H}$  and  $^{195}\text{Pt}$  NMR spectroscopy.  $^1\text{H}$  NMR signals for **4** were broadened and after 12 h, spectra showed new peaks of unknown origin. No further acetaldehyde formed. Signals for unknown compound(s):  $^1\text{H}$  NMR (300 MHz,  $\text{CD}_2\text{Cl}_2$ ): 9.17 (d,  $J_{\text{H-H}} = 9.60$  Hz), 8.65 (s), 4.78 (br, m), 3.96 (m),  $^{195}\text{Pt}$  NMR ( $\text{CD}_2\text{Cl}_2$ , 64 MHz) : -3310, -3079. **(C) End of reaction:** A solution of **4** (5 mg, 0.0053 mmol) in  $\text{CD}_2\text{Cl}_2$  (0.65 mL) was prepared inside the drybox. Outside the drybox ethylene (3.6 mL) was added at RT via the screw cap septum. After 12 hr, the reaction was completed to produce acetaldehyde and the Pt-ethyl complexes, **6** and **7**. The tube was taken into the drybox, the screw cap opened and ~3 mg of  $\sim\text{NEt}_2$  was quickly added followed by immediate recapping of the NMR tube. The contents were mixed well by shaking. The reaction was studied by  $^1\text{H}$  NMR spectroscopy. Observed additional signals:  $^1\text{H}$  NMR (500 MHz,  $\text{CD}_2\text{Cl}_2$ ): 7.06 (s, br), 6.61 (s, br), 3.18 (s with Pt satellites,  $J_{\text{Pt-H}} = 56.7$  Hz), 1.86 (s, br), -1.96 (with Pt satellites,  $J_{\text{Pt-H}} = 776$  Hz).

**Vinyloxy-trimethylsilane ( $\text{CH}_2\text{CHOSiMe}_3$ ) reaction of **4**:**  $[\text{Pt}_2(\text{COD})_2(\mu\text{-OH})\{\mu\text{-}\kappa^2\text{-C,O-CH}_2\text{C(O)H}\}](\text{OTf})_2$  (**10**) and  $(\text{COD})\text{Pt}(\text{CH}_2\text{C(O)H})(\text{OTf})$  (**11**). **(A) In  $\text{CDCl}_3$ :**  $\text{CDCl}_3$  (0.60 mL passed through activated  $\text{Al}_2\text{O}_3$ ), was transferred to an NMR tube and  $\text{CH}_2\text{CHOSiMe}_3$  (2.4  $\mu\text{L}$ , 0.016 mmol) was added. Solid **4** (5.0 mg, 0.053 mmol) was then added and the tube was shaken to mix the contents. **(B) In  $\text{CD}_2\text{Cl}_2$ :** Following a procedure similar to the above, a mixture of **10** and **11** was prepared in  $\text{CD}_2\text{Cl}_2$  by reacting  $\text{CH}_2\text{CHOSiMe}_3$  (2.3  $\mu\text{L}$ , 0.015 mmol) with **4** (5.0 mg, 0.053 mmol) in  $\text{CD}_2\text{Cl}_2$  (0.55 mL). Both complexes were characterized by  $^1\text{H}$ ,  $^1\text{H}$ - $^1\text{H}$  COSY,  $^{13}\text{C}$ ,  $^{13}\text{C}$ -DEPT,  $^1\text{H}$ - $^{13}\text{C}$  HMQC,  $^{195}\text{Pt}$  and  $^1\text{H}$ - $^{195}\text{Pt}$  HMQC and EXSY NMR spectroscopy.  $^1\text{H}$ - $^{195}\text{Pt}$  HMQC spectroscopy was done in a 300-AMX probe and EXSY was done in a 500-AMX probe (mixing time = 800 ms) at ambient temperature. A solution of **11** free of **10** was prepared by increasing the amount of  $\text{CH}_2\text{CHOSiMe}_3$  to 4.3  $\mu\text{L}$  (0.028 mmol) using the same amount of **4**.

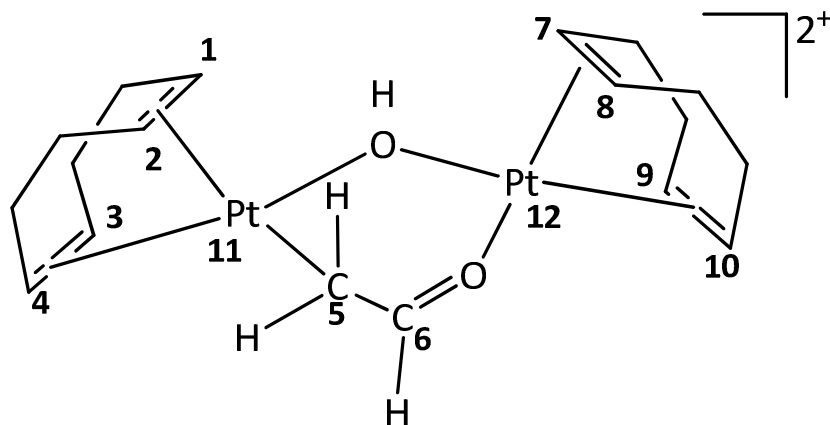

Atom labeling scheme for  $[\text{Pt}_2(\text{COD})_2(\mu\text{-OH})\{\mu\text{-}\kappa^2\text{-C,O-CH}_2\text{C(O)H}\}](\text{OTf})_2$  (**10**)

Data for **10** in CDCl<sub>3</sub>:

| H or C assignment      | <sup>1</sup> H NMR (300 MHz, CDCl <sub>3</sub> )                                   | <sup>13</sup> C NMR (125 MHz, CDCl <sub>3</sub> ) |
|------------------------|------------------------------------------------------------------------------------|---------------------------------------------------|
| OH                     | 7.46 (s)                                                                           | -                                                 |
| 1,2                    | 6.11 (m with Pt satellites, J <sub>Pt-H</sub> = 34.5 Hz)                           | 114.2                                             |
| 3,4                    | 5.25 (m with Pt satellites, J <sub>Pt-H</sub> = 68.0 Hz)                           | 88.5                                              |
| 5                      | 3.99 (d with satellites, J <sub>H5-H6</sub> = 6.0 Hz, J <sub>Pt-H</sub> = 74.0 Hz) | 47.9                                              |
| 6                      | 9.25 (t with broad unresolved satellites, J <sub>H5-H6</sub> = 6.0 Hz)             | 208.9                                             |
| 7,8 & 9,10             | 6.26 (br, s) & 5.67 (br s)                                                         | 102.8 & 98.6                                      |
| COD CH <sub>2</sub> 's | 2.70- 2.28 (m, COD CH <sub>2</sub> 's)                                             |                                                   |

<sup>195</sup>Pt NMR (64 MHz, CDCl<sub>3</sub>) -3065 (s, Pt 12), -3410 (s, Pt 11) equal intensities.

Data for **10** in CD<sub>2</sub>Cl<sub>2</sub>: <sup>1</sup>H NMR (300 MHz, CD<sub>2</sub>Cl<sub>2</sub>): 9.31 (t with broad unresolved satellites, J<sub>H5-H6</sub> = 6.3 Hz, 1H, H6,), 7.52 (s, 1H, bridging OH) 6.24 (br s with Pt satellites, J<sub>Pt-H</sub> = 69.0 Hz, 2H, COD CH's at 7, 8 or 9,10), 6.11 (m with satellites, J<sub>Pt-H</sub> = 23.4 Hz, 2H, COD CH's at 1,2), 5.67 (br s, 2H, COD CH's at 7,8 or 9,10), ~ 5.30 (m overlapping with solvent signal at 5.32 ppm, 2H, CH's at 3,4), 3.94 (d with satellites, J<sub>H5-H6</sub> = 6.3 Hz, J<sub>Pt-H</sub> = 80.1 Hz, 2H, H5), 2.70- 2.25 (m, COD CH<sub>2</sub>'s)

<sup>195</sup>Pt NMR (64 MHz, CD<sub>2</sub>Cl<sub>2</sub>): -3080 (s), -3417 (s) (1:1 ratio).

<sup>195</sup>Pt NMR (64 MHz, CD<sub>2</sub>Cl<sub>2</sub>) at -20°C: -3101 (s), -3434 (s) (1:1 ratio).

<sup>195</sup>Pt NMR (64 MHz, CD<sub>2</sub>Cl<sub>2</sub>) at -50°C: -3110 (s), -3442 (s) (1:1 ratio).

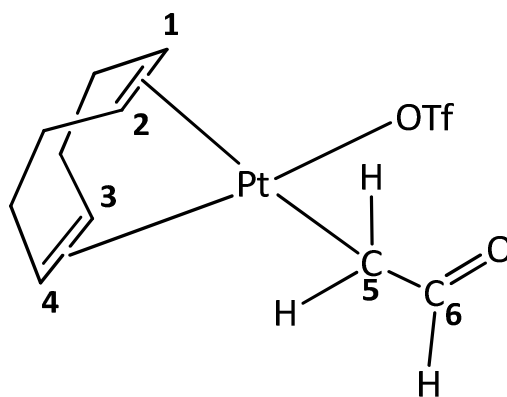

Atom labeling for the NMR data of Pt(COD)(CH<sub>2</sub>C(O)H)(OTf) (**11**)

Data for **11** in CDCl<sub>3</sub>: <sup>1</sup>H NMR (500 MHz, CDCl<sub>3</sub>): 9.67 (t, J<sub>H5-H6</sub> = 4.5 Hz 1H, H6,), 5.95 (m with Pt satellites, J<sub>Pt-H</sub> = 30.5 Hz, 2H, COD CH's at 1,2), 4.85 (m, J<sub>Pt-H</sub> = 86.5 Hz, 2H, COD CH's 3,4), 2.84 (d with Pt satellites, J<sub>H5-H6</sub> = 4.5 Hz, J<sub>Pt-H</sub> = 81.5 Hz, 2H, H5), 2.70- 2.28 (m, COD CH<sub>2</sub>'s), <sup>13</sup>C NMR (126 MHz, CDCl<sub>3</sub>): 115.5 (s, C1,2), 86.2 (s, C3,4),

37.8 (s, C5), A signal for C6 is not observed (see text).  $^{195}\text{Pt}$  NMR (64 MHz,  $\text{CDCl}_3$ ) - 3342 (s).

Data for **11** in  $\text{CD}_2\text{Cl}_2$ :  $^1\text{H}$  NMR (300 MHz,  $\text{CD}_2\text{Cl}_2$ ): 9.65 (t,  $J_{\text{H5-H6}} = 4.5$  Hz, 1H, H6), 5.91 (m with Pt satellites,  $J_{\text{Pt-H}} = 50.1$  Hz, 2H, COD CH's at 1 & 2), 4.87 (m with Pt satellites,  $J_{\text{Pt-H}} = 86.4$  Hz, 2H, COD CH's at 3 & 4), 2.83 (d with Pt satellites,  $J_{\text{H5-H6}} = 4.5$  Hz,  $J_{\text{Pt-H}} = 84.0$  Hz, 2H, H5), 2.70- 2.25 (m, COD  $\text{CH}_2$ 's).  $^{195}\text{Pt}$  NMR (64 MHz,  $\text{CD}_2\text{Cl}_2$ ): - 3342 (s). At  $-20^\circ\text{C}$ ,  $^{195}\text{Pt}$  NMR (64 MHz,  $\text{CD}_2\text{Cl}_2$ ): -3325 (s). At  $-50^\circ\text{C}$ ,  $^{195}\text{Pt}$  NMR (64 MHz,  $\text{CD}_2\text{Cl}_2$ ): -3311 (s).

**Effect of HOTf on 10 & 11:** Outside the drybox corannulene (1.3 mg, 0.0052 mmol) was measured into a NMR tube. The tube taken inside the drybox and dissolved in  $\text{CDCl}_3$  (0.75 mL passed through activated  $\text{Al}_2\text{O}_3$ ) and a couple of molecular sieves were added to quench any residual water in the solvent.  $\text{CH}_2\text{CHOSiMe}_3$  (2.0  $\mu\text{L}$ , 0.013 mmol) was added followed by **4** (5.0 mg, 0.0053 mmol). The contents were mixed by shaking and immediately analyzed by  $^1\text{H}$  NMR spectroscopy in a 300-AMX probe which showed a 66:33 mixture of **10** and **11**. The NMR tube was taken into the drybox and aliquots of a freshly prepared 0.11 M stock solution of HOTf in  $\text{CDCl}_3$ , were added consecutively; 1.0  $\mu\text{L}$ , 2.0  $\mu\text{L}$ , 3.0  $\mu\text{L}$ , 4.0  $\mu\text{L}$  and 5.5  $\mu\text{L}$ . Between each addition, ~ 25 min were given for equilibration. After each addition the reaction was monitored by  $^1\text{H}$  NMR and  $^{195}\text{Pt}$  NMR spectroscopy in a 300-AMX probe.

$^1\text{H}$  NMR: With each addition, signals belonging to **11** broadened and the intensity of **10** decreased.

$^{195}\text{Pt}$  NMR (64 MHz,  $\text{CDCl}_3$ ): Results shown in table below.

Effect of HOTf on **10** & **11**

| <b>Aliquots of 0.11 M HOTf</b> | <b><math>^{195}\text{Pt}</math> NMR signals</b> |
|--------------------------------|-------------------------------------------------|
| No added HOTf                  | -3066, -3344, -3410                             |
| 1.0 $\mu\text{L}$              | -3066, -3410                                    |
| 3.0 $\mu\text{L}$              | -2950, -3066, -3410                             |

**Ethylene reaction of 10 and 11. (A)**  $\text{CD}_2\text{Cl}_2$  (0.65 mL passed through activated  $\text{Al}_2\text{O}_3$ ), was transferred to a screw cap NMR tube containing corannulene (0.8 mg, 0.003 mmol).  $\text{CH}_2\text{CHOSiMe}_3$  (1.8  $\mu\text{L}$ , 0.011 mmol) was added followed by solid **4** (5.0 mg, 0.00533 mmol) and the tube was placed in an ice/salt bath. Ethylene (3.6 mL, 0.14 mmol) was injected via the screw cap septum. The contents were mixed and immediately the NMR tube was placed in the NMR probe (AMX-300MHz) at ambient temperature. The reaction was monitored by  $^1\text{H}$  NMR spectroscopy. **(B) With 1% HOTf:** A  $\text{CD}_2\text{Cl}_2$  solution of **10**, **11** and corannulene was prepared as above. HOTf (1.0  $\mu\text{L}$  from 0.055 M stock solution of HOTf in  $\text{CDCl}_3$ ) was added and the tube was placed in an ice/salt bath. Ethylene (3.6 mL, 0.14 mmol) was injected via the screw cap septum and the reaction was monitored by  $^1\text{H}$  NMR spectroscopy as above. **(C) With residual  $[\text{Pt}(\text{COD})(\text{OH})_2(\text{OTf})_2]$  (**4**):**  $\text{CD}_2\text{Cl}_2$  (0.65 mL passed through activated  $\text{Al}_2\text{O}_3$ ), was transferred to a screw cap NMR tube containing corannulene (0.8 mg, 0.003 mmol).  $\text{CH}_2\text{CHOSiMe}_3$  (1.8  $\mu\text{L}$ , 0.011 mmol) was added followed by solid **4** (5.0 mg, 0.0053

mmol) and the tube was placed in a dry ice/acetone bath. Ethylene (3.8 mL, 0.15 mmol) was injected via the screw cap septum. The contents were mixed and the NMR tube was placed in the NMR probe (AMX-300MHz) at ambient temperature. The reaction was monitored by  $^1\text{H}$  NMR spectroscopy.

**HOTf reactions of  $[\text{Pt}_2(\text{COD})_2(\mu\text{-OH})\{\mu\text{-}\kappa^2\text{-C,O-CH}_2\text{C(O)H}\}](\text{OTf})_2$  (10) and  $(\text{COD})\text{Pt}(\text{CH}_2\text{C(O)H})(\text{OTf})$  (11).** Separate reactions were carried out with additions of HOTf to a mixture (of **10** and **11**) and exclusively to **11**. **(A) Mixture of 10 and 11:** Outside the drybox, corannulene (1.3 mg, 0.0052 mmol) was measured into a NMR tube. The tube was taken into the drybox, and  $\text{CDCl}_3$  (0.75mL passed through activated  $\text{Al}_2\text{O}_3$ ), and  $\text{CH}_2\text{CHOSiMe}_3$  (2.8  $\mu\text{L}$ , 0.018 mmol) were transferred to it. Solid **4** (5.0 mg, 0.0053 mmol) was added and mixed well by shaking.  $^1\text{H}$  and  $^{195}\text{Pt}$  NMR showed a mixture of **10** and **11**. Neat HOTf (0.5  $\mu\text{L}$ , 0.0053 mmol) was added and mixed well by shaking. The reaction mixture was immediately characterized by  $^1\text{H}$  and  $^{195}\text{Pt}$  NMR spectroscopy in a 300-AMX probe.  $^1\text{H}$  NMR (300 MHz,  $\text{CDCl}_3$ ): 6.24 (br), 5.97 (s with Pt satellites  $J_{\text{Pt-H}} = 78.6$  Hz), 2.82 (br s), 2.02 (m). Acetaldehyde yield = 36%.  $^{195}\text{Pt}$  NMR (64 MHz,  $\text{CDCl}_3$ ): -2950 (major), -2985. **After 14 days:**  $^1\text{H}$  NMR (300 MHz,  $\text{CDCl}_3$ ): 5.75 (s, br), 5.27 (s), 2.77 (m, br), 2.6-2.4 (m,br) Acetaldehyde yield = 100%.  $^{195}\text{Pt}$  NMR (64 MHz,  $\text{CDCl}_3$ ): -2745. **(B) Only 11:** Outside the drybox, corannulene (1.2 mg, 0.0048 mmol) was measured into a screw cap NMR tube. The tube was taken into the drybox and  $\text{CDCl}_3$  (0.75mL passed through activated  $\text{Al}_2\text{O}_3$ ), and  $\text{CH}_2\text{CHOSiMe}_3$  (5.0  $\mu\text{L}$ , 0.033 mmol) were transferred to it. Solid **4** (5.5 mg, 0.0059 mmol) was added and mixed well by shaking.  $^1\text{H}$  and  $^{195}\text{Pt}$  NMR spectroscopy (300-AMX) showed a solution of exclusively **11**. HOTf (52.0  $\mu\text{L}$  of 0.11 M solution in  $\text{CDCl}_3$ ) was added and the contents mixed well by shaking. The reaction mixture was characterized by  $^1\text{H}$  and  $^{195}\text{Pt}$  NMR spectroscopy in a 300-AMX probe.  $^1\text{H}$  NMR (300 MHz,  $\text{CDCl}_3$ ): 6.28 (s with Pt satellites  $J_{\text{Pt-H}} = 77.4$  Hz), 5.98 (s, br), 2.83 (s, br), 2.5 -2.2 (m, br). Acetaldehyde yield = 50%. At -20°C:  $^1\text{H}$  NMR (300 MHz,  $\text{CDCl}_3$ ): 6.26 (s with Pt satellites  $J_{\text{Pt-H}} = 77.4$  Hz), 5.94 (s), 2.83 (m), 2.5 -2.2 (m, br).  $^{195}\text{Pt}$  NMR (64 MHz,  $\text{CDCl}_3$ ): -2950, -2985 (major). At -20°C:  $^{195}\text{Pt}$  NMR (64 MHz,  $\text{CDCl}_3$ ): -2969, -3000 (major).

The NMR tube with contents was taken back into the drybox and HOTf (52.0  $\mu\text{L}$  of 0.11M solution in  $\text{CDCl}_3$ ) was added and mixed well. The reaction mixture was studied by  $^1\text{H}$  and  $^{195}\text{Pt}$  NMR spectroscopy at ambient temperature.

$^1\text{H}$  NMR (300 MHz,  $\text{CDCl}_3$ ): 6.28 (s with Pt satellites  $J_{\text{Pt-H}} = 77.4$  Hz), 6.10 (s, br), 2.83 (m), 2.03 (m overlapped with broad signals from 2.5-2.1). Acetaldehyde yield = 50%.

$^{195}\text{Pt}$  NMR (300 MHz,  $\text{CDCl}_3$ ): -2986

Ethylene (1.0 mL) was added by injecting through the screw cap septum and the sample was allowed to react for the next 12 hr.

$^1\text{H}$  NMR (300 MHz,  $\text{CDCl}_3$ ): 10.52 (s, br), and signals for **6**.

$^{195}\text{Pt}$  NMR (64 MHz,  $\text{CDCl}_3$ ): -3467.

In both reactions  $(\text{COD})\text{Pt}(\text{OTf})_2$  is produced. Data for  $(\text{COD})\text{Pt}(\text{OTf})_2$ .  $^1\text{H}$  NMR (300 MHz,  $\text{CDCl}_3$ ): 6.29 (s with Pt satellites  $J_{\text{Pt-H}} = 77.7$  Hz, 4H, COD CH's), 2.87 & 2.24 (m, 8H, COD  $\text{CH}_2$ 's).  $^{195}\text{Pt}$  NMR (64 MHz,  $\text{CDCl}_3$ ): -2990.

**Water reaction of  $[\text{Pt}_2(\text{COD})_2(\mu\text{-OH})\{\mu\text{-}\kappa^2\text{-C,O-CH}_2\text{C(O)H}\}](\text{OTf})_2$  (**10**) and  $(\text{COD})\text{Pt}(\text{CH}_2\text{C(O)H})(\text{OTf})$  (**11**).** Outside the drybox, corannulene (1.6 mg, 0.0064 mmol) was measured into an NMR tube. The tube was taken into the drybox, and  $\text{CD}_2\text{Cl}_2$  (0.50 mL passed through activated  $\text{Al}_2\text{O}_3$ ), and  $\text{CH}_2\text{CHOSiMe}_3$  (6.5  $\mu\text{L}$ , 0.043 mmol) were added. Solid **4** (10.0 mg, 0.011 mmol) was added and the contents mixed well by shaking.  $^1\text{H}$  and  $^{195}\text{Pt}$  NMR showed a 90:10 mixture of **10** and **11**. Outside the drybox, the NMR tube was opened and de-ionized  $\text{H}_2\text{O}$  (0.20  $\mu\text{L}$ , 0.011 mmol) was added. The tube was closed and the contents mixed well by shaking. The reaction mixture was immediately characterized by  $^1\text{H}$  and  $^{195}\text{Pt}$  NMR spectroscopy. After 24 hr, characteristic  $^1\text{H}$  and  $^{195}\text{Pt}$  NMR signals of **4** were observed.  $^1\text{H}$  NMR (300 MHz,  $\text{CD}_2\text{Cl}_2$ ): 5.67 (s, br), 2.76 (m), 2.22 (m).  $^{195}\text{Pt}$  NMR (64 MHz,  $\text{CD}_2\text{Cl}_2$ ): -2762.

**Ethylene reaction of  $\text{Pt}(\text{COD})(\text{OTf})_2$  . (A) In  $\text{CD}_3\text{NO}_2$ :** In the drybox,  $\text{Pt}(\text{COD})(\text{OTf})_2$  (5.0 mg, 0.0083 mmol) was placed into a screw cap NMR tube and dissolved in 0.45 mL  $\text{CD}_3\text{NO}_2$ . The NMR tube was placed in dry ice/acetone bath and ethylene (4.0 mL, 0.16 mmol) was injected via the screw cap septum. The tube was taken from the dry ice/acetone bath and contents mixed well by thoroughly shaking. The reaction was monitored by  $^1\text{H}$  NMR spectroscopy in the 300-AMX probe and found to take ~ 2 h to reach completion to produce Pt-ethyl ethylene complex **7** and HOTf. **(B) In  $\text{CD}_2\text{Cl}_2$ :** A procedure similar to A was followed in  $\text{CD}_2\text{Cl}_2$  and the reaction was found to take 6-12 h to reach completion to produce **7** and HOTf (~  $\delta$  13.5).  $\sim\text{NET}_2$  (~ 6 mg) was added and the HOTf signal at ~  $\delta$  13.5 (br) disappeared. After ~ 20 min  $(\text{COD})\text{Pt}(\text{Et})(\text{OTf})$  (**6**) appeared. Characteristic signals for (**6**):  $^1\text{H}$  NMR (AMX-300,  $\text{CD}_2\text{Cl}_2$ ): 5.81 (m,  $J_{\text{Pt-H}} = 24.5$  Hz) 4.41 (m,  $J_{\text{Pt-H}} = 97.5$  Hz), 1.54 (overlapped), 0.89 (t).

**Observation of  $[(\text{COD})\text{Pt}(\text{OH})]_2[\text{OTf}]_2$  (**4**) from  $(\text{COD})\text{Pt}(\text{OTf})_2 + 10$  eq  $\text{H}_2\text{O}$ :** Inside the dry box  $(\text{COD})\text{Pt}(\text{OTf})_2$  (4.5 mg, 0.0075 mmol) was measured into a NMR tube and dissolved in 0.45 mL  $\text{CD}_2\text{Cl}_2$ . The tube was taken out from the drybox, the NMR cap opened and de-ionized  $\text{H}_2\text{O}$  (1.5  $\mu\text{L}$ , 0.083 mmol) added and mixed well by shaking.  $^1\text{H}$  and  $^{195}\text{Pt}$  NMR spectroscopy displayed that **4** has formed. Characteristic signals for **4**:  $^1\text{H}$  NMR (AMX-300,  $\text{CD}_2\text{Cl}_2$ ): 5.67 (s, br with Pt satellites)  $^{195}\text{Pt}$  NMR (64 MHz,  $\text{CD}_2\text{Cl}_2$ ): -2762

**$(\text{COD})\text{Pt}(\text{OTf})_2 + 1$  equivalent of  $\text{H}_2\text{O} + \text{C}_2\text{H}_4$ :** Outside the drybox corannulene (1.0 mg, 0.0039 mmol) was added to a screw cap NMR tube and the tube was taken inside the drybox.  $(\text{COD})\text{Pt}(\text{OTf})_2$  (5.0 mg, 0.0083 mmol) was added and the solids dissolved in 0.50 mL  $\text{CD}_2\text{Cl}_2$ . The tube was taken out from the dry box. The screw cap was opened and de-ionized  $\text{H}_2\text{O}$  (15.0  $\mu\text{L}$  from a solution of 990  $\mu\text{L}$  of  $\text{CDCl}_3$  and 10  $\mu\text{L}$   $\text{H}_2\text{O}$ ) was added and mixed well by shaking. Ethylene (4.0 mL, 16.0 mmol) was added via the screw cap septum and the contents were well mixed by shaking. The reaction was monitored by  $^1\text{H}$  NMR spectroscopy. (300-AMX)

**$(\text{COD})\text{Pt}(\text{OTf})_2 + \text{H}_2\text{O} + \text{C}_2\text{H}_4$ :** The following experiments were performed from a same batch of  $(\text{COD})\text{Pt}(\text{OTf})_2$  and same stock solvent of  $\text{CD}_2\text{Cl}_2$ . The amount of  $\text{H}_2\text{O}$  was varied from 20 equivalents, 10 equivalents to 5 equivalents. **(A) 20 equivalents of  $\text{H}_2\text{O}$ :** Corannulene (1.0 mg, 0.0039 mmol) was added to a screw cap NMR tube and the



tube was taken into the drybox. (COD)Pt(OTf)<sub>2</sub> (5.0 mg, 0.0083 mmol) was added and the solids were dissolved in 0.45 mL CD<sub>2</sub>Cl<sub>2</sub>. The sealed tube was taken outside the drybox, opened and de-ionized H<sub>2</sub>O (3.0 µL, 0.17 mmol) was added and mixed well. The NMR tube was placed in dry ice/acetone bath and ethylene (4.0 mL, 0.16 mmol) was added via the screw cap septum. The tube was taken out from the bath and mixed well by shaking and immediately placed in 300-AMX probe at ambient temperature. The reaction was measured by <sup>1</sup>H NMR spectroscopy. **(B) 10 equivalents of H<sub>2</sub>O:** A procedure similar to above was followed to produce a CD<sub>2</sub>Cl<sub>2</sub> solution of (COD)Pt(OTf)<sub>2</sub> (5.0 mg, 0.0083 mmol) and corannulene (1.3 mg, 0.0052 mmol) followed by the addition of de-ionized H<sub>2</sub>O (1.5 µL, 0.083 mmol). Ethylene addition and reaction monitoring were also performed similar to the procedure described above. **(C) 5 equivalents of H<sub>2</sub>O:** A procedure similar to above was followed to monitor a reaction of corannulene (1.4 mg, 0.0056 mmol), (COD)Pt(OTf)<sub>2</sub> (5.0 mg, 0.0083 mmol) de-ionized H<sub>2</sub>O (0.8 µL, 0.044 mmol) and ethylene (4.0 mL, 0.16 mmol) in 0.45 mL CD<sub>2</sub>Cl<sub>2</sub>.

## References

- (1) Hoops, S.; Sahle, S.; Gauges, R.; Lee, C.; Pahle, J.; Simus, N.; Singhal, M.; Xu, L.; Mendes, P.; Kummer, U. *Bioinformatics* **2006**, 22, 3067.
- (2) Sygula, A.; Rabideau, P. W. *J. Am. Chem. Soc.* **2000**, 122, 6323.
- (3) Weliange, N. M.; Szuromi, E.; Sharp, P. R. *J. Am. Chem. Soc.* **2009**, 131, 8736.
- (4) Clark, H. C.; Manzer, L. E. *J. Organomet. Chem.* **1973**, 59, 411.
- (5) Karshtedt, D.; Bell, A. T.; Tilley, T. D. *Organometallics* **2004**, 23, 4169
